# Supplementary material for: mRNA-Driven Generation of Transgene-Free Neural Stem Cells from Human Urine-Derived Cells
Source: Cells. 2019 Sep 6;8(9):1043. doi: 10.3390/cells8091043 (PMC6769943; doi:10.3390/cells8091043)
Supplement: Supplementary file 1 [file cells-08-01043-s001.pdf]

## Supplementary Materials

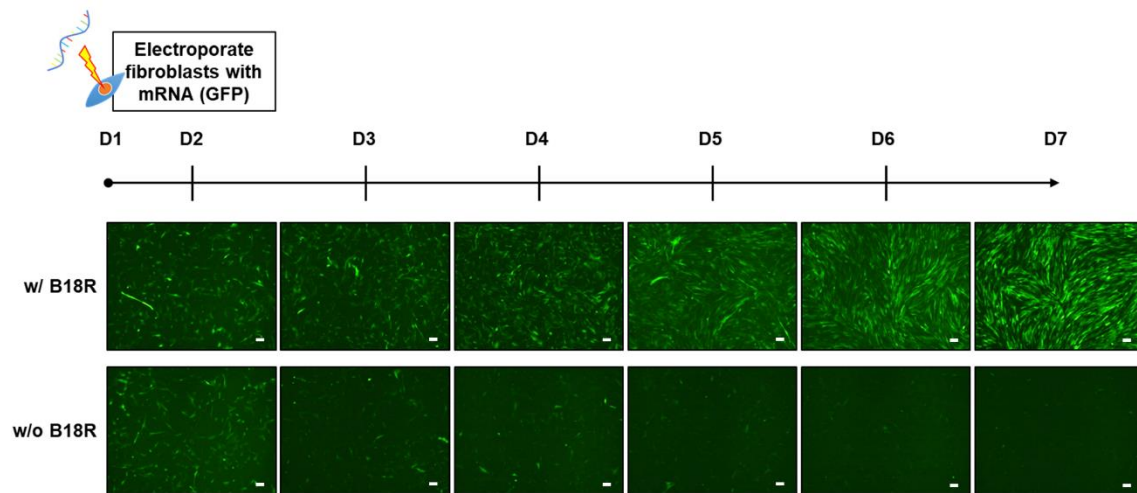

**Supplemental Figure S1.** Withdrawal of B18R protein diminishes GFP expression induced by synthetic mRNAs. Withdrawal of B18R protein from culture condition diminished the synthetic mRNA-based GFP expression in transfected cells.

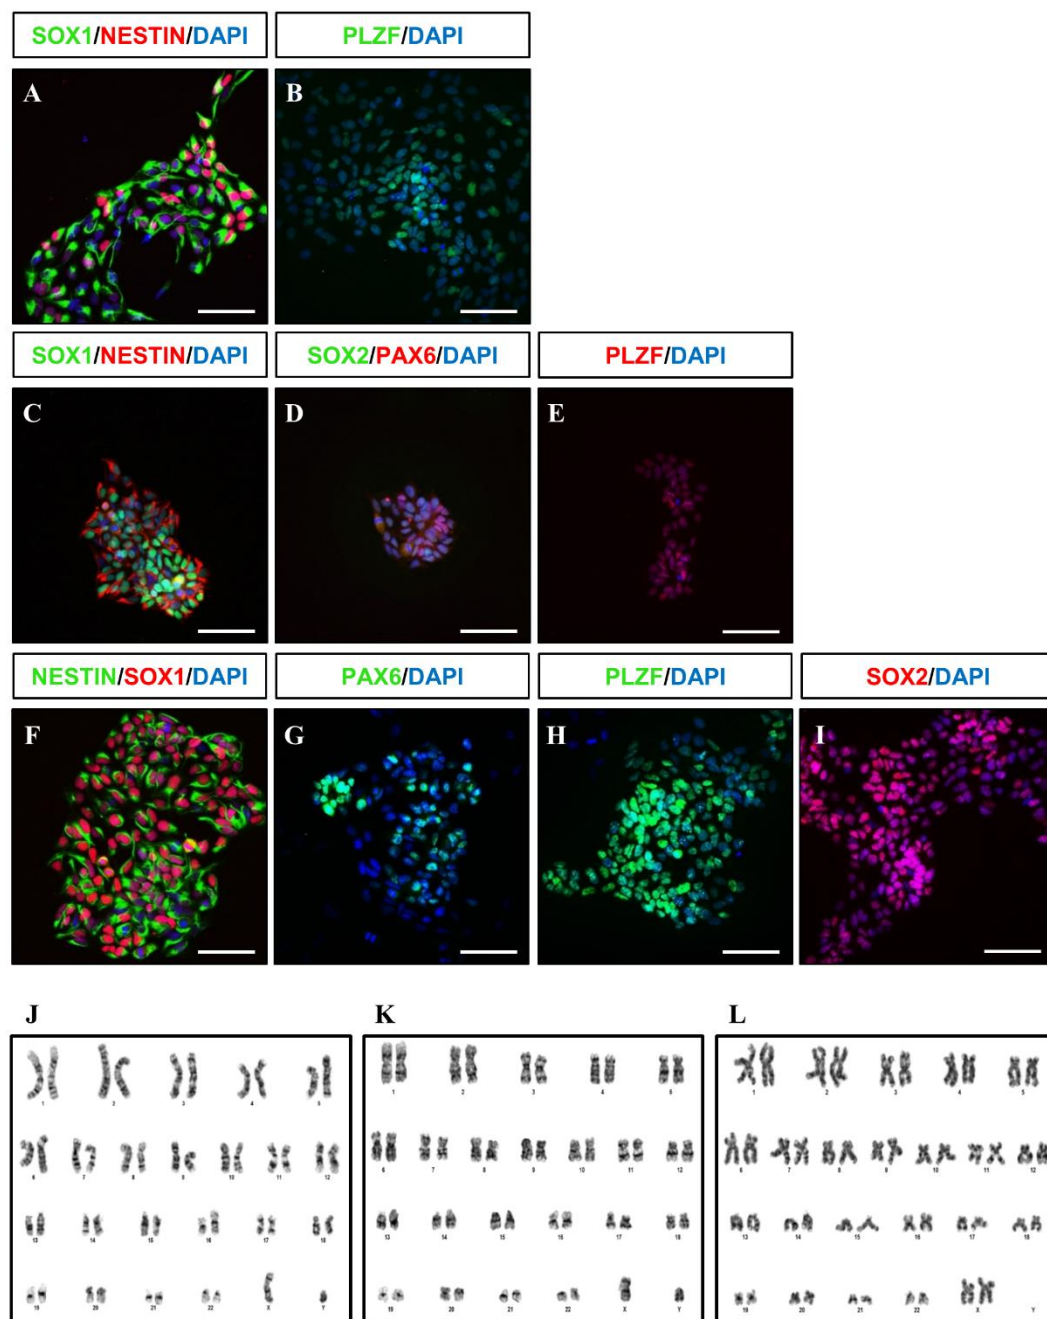

**Supplemental Figure S2.** Characterization of iNSCs derived from healthy donors. (A, B) NSC marker expression of iNSCs from HUCs, derived from male, 31-year-old. (C-E) NSC marker expression of iNSCs from HUCs, derived from male, 38-year-old. (F-I) NSC marker expression of iNSCs from HUCs, derived from female, 36-year-old. (J) Karyotyping of iNSCs from HUCs, derived from male, 31-year-old. (K) Karyotyping of iNSCs from HUCs, derived from male, 38-year-old. (L) Karyotyping of iNSCs from HUCs, derived from female, 36-year-old. Scale bars, 200 μm.

A

Sample No. 1 2  
Match Analysis

| Locus                                                     | Reference Database Profile |      | Sample Profile    |      | Shared alleles # |
|-----------------------------------------------------------|----------------------------|------|-------------------|------|------------------|
|                                                           | Database : Urine           |      | Sample Name : NSC |      |                  |
| D5S818                                                    | 8                          | 9    | 8                 | 9    | 2                |
| D13S317                                                   | 9                          | 13   | 9                 | 13   | 2                |
| D7S820                                                    | 11                         | 12   | 11                | 12   | 2                |
| D16S539                                                   | 11                         |      | 11                |      | 1                |
| vWA                                                       | 16                         | 17   | 16                | 17   | 2                |
| TH01                                                      | 7                          | 9    | 7                 | 9    | 2                |
| TPOX                                                      | 9                          | 11   | 9                 | 11   | 2                |
| CSF1PO                                                    | 10                         | 12   | 10                | 12   | 2                |
| AMEL                                                      | X                          | Y    | X                 | Y    | 2                |
| D3S1358                                                   | 16                         |      | 16                |      | 1                |
| D21S11                                                    | 29                         | 30   | 29                | 30   | 2                |
| D18S51                                                    | 15                         | 18   | 15                | 18   | 2                |
| D8S1179                                                   | 12                         | 13   | 12                | 13   | 2                |
| FGA                                                       | 21                         | 21.2 | 21                | 21.2 | 2                |
| D2S1338                                                   | 24                         | 25   | 24                | 25   | 2                |
| D19S433                                                   | 14.2                       | 15   | 14.2              | 15   | 2                |
| Penta D                                                   | 9                          | 12   | 9                 | 12   | 2                |
| Penta E                                                   | 16                         | 17   | 16                | 17   | 2                |
| Number of shared alleles                                  |                            |      |                   |      | 34               |
| Total number of alleles in the reference database profile |                            |      |                   |      | 34               |
| % match                                                   |                            |      |                   |      | 100.0%           |
| Result interpretation                                     |                            |      |                   |      | Related          |

B

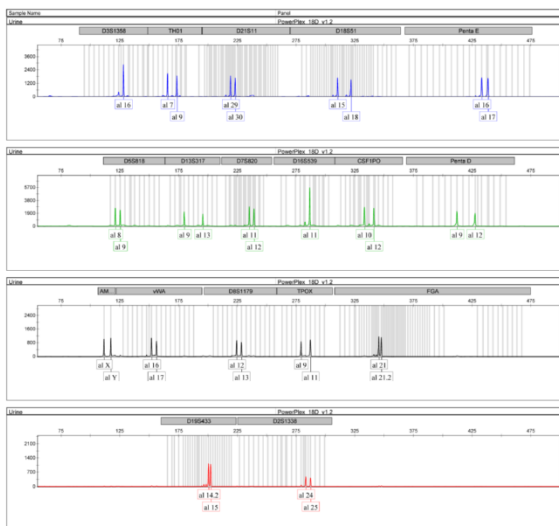

C

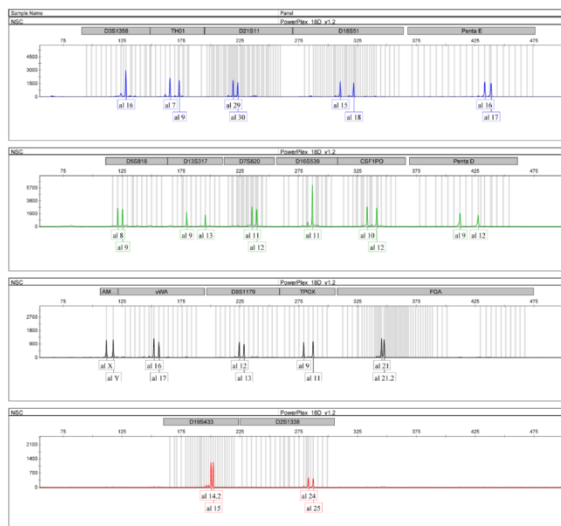

D

Sample No. 1 2

Match Analysis

| Locus                                                     | Reference Database Profile |      | Sample Profile         |      | Shared alleles # |
|-----------------------------------------------------------|----------------------------|------|------------------------|------|------------------|
|                                                           | Database : Urine-gang      |      | Sample Name : NSC-gang |      |                  |
| D5S818                                                    | 10                         | 11   | 10                     | 11   | 2                |
| D13S317                                                   | 11                         | 12   | 11                     | 12   | 2                |
| D7S820                                                    | 8                          | 12   | 8                      | 12   | 2                |
| D16S539                                                   | 9                          | 10   | 9                      | 10   | 2                |
| vWA                                                       | 18                         | 19   | 18                     | 19   | 2                |
| TH01                                                      | 9                          |      | 9                      |      | 1                |
| TPOX                                                      | 8                          |      | 8                      |      | 1                |
| CSF1PO                                                    | 12                         |      | 12                     |      | 1                |
| AMEL                                                      | X                          | Y    | X                      | Y    | 2                |
| D3S1358                                                   | 16                         | 17   | 16                     | 17   | 2                |
| D21S11                                                    | 30                         | 32.2 | 30                     | 32.2 | 2                |
| D18S51                                                    | 13                         | 16   | 13                     | 16   | 2                |
| D8S1179                                                   | 15                         | 16   | 15                     | 16   | 2                |
| FGA                                                       | 20                         | 22   | 20                     | 22   | 2                |
| D2S1338                                                   | 18                         | 24   | 18                     | 24   | 2                |
| D19S433                                                   | 13                         | 14   | 13                     | 14   | 2                |
| Penta D                                                   | 11                         | 12   | 11                     | 12   | 2                |
| Penta E                                                   | 11                         | 12   | 11                     | 12   | 2                |
| Number of shared alleles                                  |                            |      |                        |      | 33               |
| Total number of alleles in the reference database profile |                            |      |                        |      | 33               |
| % match                                                   |                            |      |                        |      | 100.0%           |
| Result interpretation                                     |                            |      |                        |      | Related          |

E

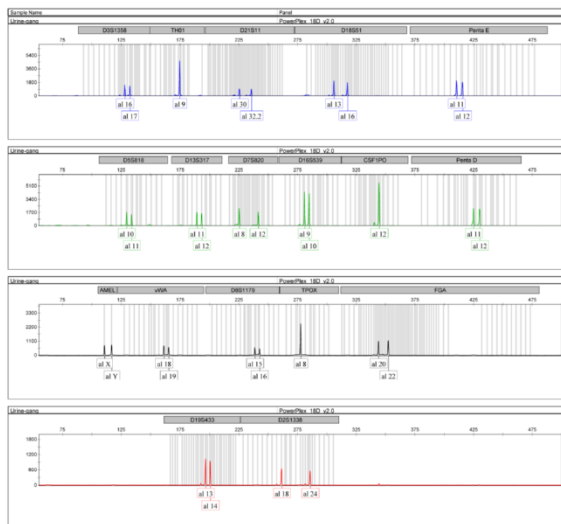

F

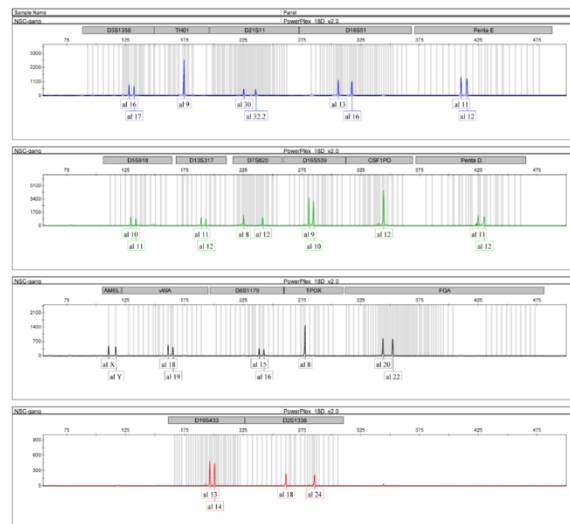

G

Sample No. 1 2  
Match Analysis

| Locus                                                     | Reference Database Profile |      | Sample Profile              |      | Shared alleles # |
|-----------------------------------------------------------|----------------------------|------|-----------------------------|------|------------------|
|                                                           | Database : Urine no.1 M38  |      | Sample Name : iNSC no.1 M38 |      |                  |
| D5S818                                                    | 9                          | 13   | 9                           | 13   | 2                |
| D13S317                                                   | 8                          | 11   | 8                           | 11   | 2                |
| D7S820                                                    | 10                         | 11   | 10                          | 11   | 2                |
| D16S539                                                   | 9                          |      | 9                           |      | 1                |
| vWA                                                       | 17                         |      | 17                          |      | 1                |
| TH01                                                      | 9                          |      | 9                           |      | 1                |
| TPOX                                                      | 9                          | 11   | 9                           | 11   | 2                |
| CSF1PO                                                    | 10                         |      | 10                          |      | 1                |
| AMEL                                                      | X                          | Y    | X                           | Y    | 2                |
| D3S1358                                                   | 15                         | 17   | 15                          | 17   | 2                |
| D21S11                                                    | 29                         | 31   | 29                          | 31   | 2                |
| D18S51                                                    | 14                         | 18   | 14                          | 18   | 2                |
| D8S1179                                                   | 13                         |      | 13                          |      | 1                |
| FGA                                                       | 23                         |      | 23                          |      | 1                |
| D2S1338                                                   | 17                         | 23   | 17                          | 23   | 2                |
| D19S433                                                   | 14                         | 16.2 | 14                          | 16.2 | 2                |
| Penta D                                                   | 11                         |      | 11                          |      | 1                |
| Penta E                                                   | 10                         | 12   | 10                          | 12   | 2                |
| Number of shared alleles                                  |                            |      |                             |      | 29               |
| Total number of alleles in the reference database profile |                            |      |                             |      | 29               |
| % match                                                   |                            |      |                             |      | 100.0%           |
| Result interpretation                                     |                            |      |                             |      | Related          |

H

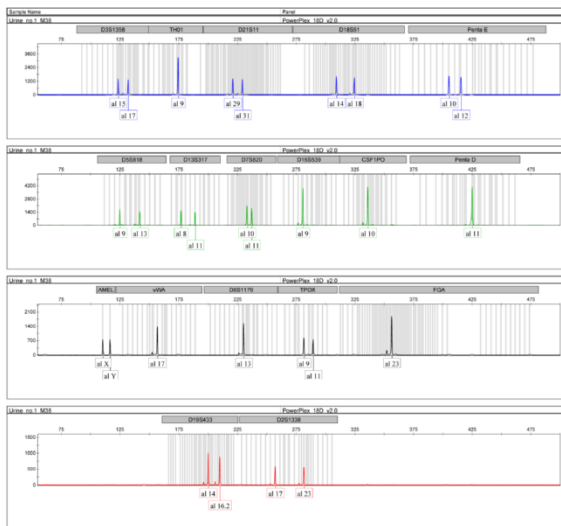

I

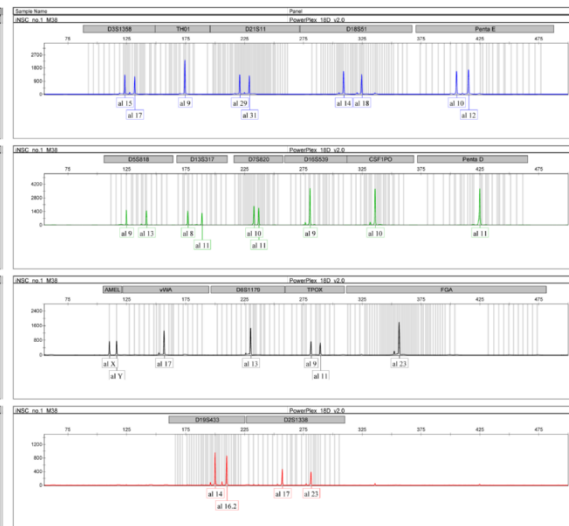

J

Sample No. 1 2

Match Analysis

| Locus                                                     | Reference Database Profile |    | Sample Profile        |    | Shared alleles # |
|-----------------------------------------------------------|----------------------------|----|-----------------------|----|------------------|
|                                                           | Database : Urine-EK        |    | Sample Name : iNSC-EK |    |                  |
| D5S818                                                    | 9                          | 12 | 9                     | 12 | 2                |
| D13S317                                                   | 8                          | 13 | 8                     | 13 | 2                |
| D7S820                                                    | 8                          | 13 | 8                     | 13 | 2                |
| D16S539                                                   | 10                         |    | 10                    |    | 1                |
| vWA                                                       | 17                         |    | 17                    |    | 1                |
| TH01                                                      | 6                          | 7  | 6                     | 7  | 2                |
| TPOX                                                      | 8                          |    | 8                     |    | 1                |
| CSF1PO                                                    | 10                         | 12 | 10                    | 12 | 2                |
| AMEL                                                      | X                          |    | X                     |    | 1                |
| D3S1358                                                   | 16                         | 17 | 16                    | 17 | 2                |
| D21S11                                                    | 29                         | 30 | 29                    | 30 | 2                |
| D18S51                                                    | 16                         |    | 16                    |    | 1                |
| D8S1179                                                   | 10                         | 11 | 10                    | 11 | 2                |
| FGA                                                       | 22.2                       | 24 | 22.2                  | 24 | 2                |
| D2S1338                                                   | 19                         | 21 | 19                    | 21 | 2                |
| D19S433                                                   | 12                         | 14 | 12                    | 14 | 2                |
| Penta D                                                   | 9                          |    | 9                     |    | 1                |
| Penta E                                                   | 14                         | 20 | 14                    | 20 | 2                |
| Number of shared alleles                                  |                            |    |                       |    | 30               |
| Total number of alleles in the reference database profile |                            |    |                       |    | 30               |
| % match                                                   |                            |    |                       |    | 100.0%           |
| Result interpretation                                     |                            |    |                       |    | Related          |

K

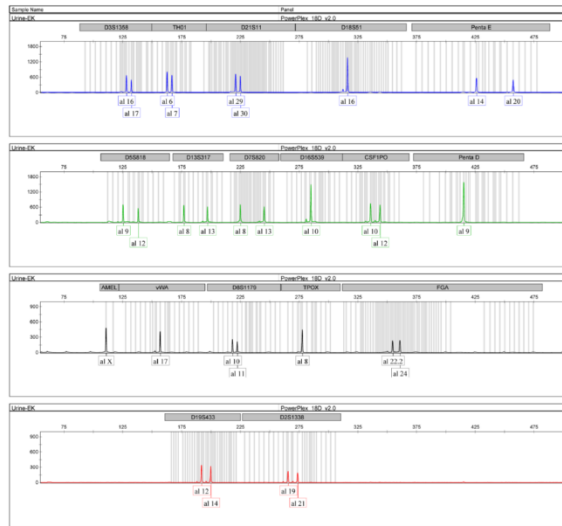

L

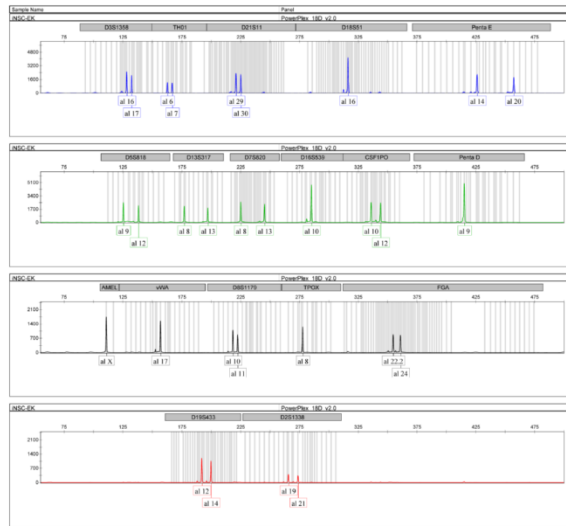

**Supplemental Figure S3.** STR analysis of iNSCs derived from healthy donors. (A-C) STR DNA profiling analysis of parental HUCs and iNSCs, derived from male, 32-year-old. (B) and (C) are peak data (electropherogram) for parental HUCs and iNSCs, respectively. (D-F) STR DNA profiling analysis of parental HUCs and iNSCs, derived from male, 31-year-old. (E) and (F) are peak data (electropherogram) for parental

HUCs and iNSCs, respectively. **(G-I)** STR DNA profiling analysis of parental HUCs and iNSCs, derived from male, 38-year-old. **(H)** and **(I)** are peak data (electropherogram) for parental HUCs and iNSCs, respectively. **(J-L)** STR DNA profiling analysis of parental HUCs and iNSCs, derived from female, 36-year-old. **(K)** and **(L)** are peak data (electropherogram) for parental HUCs and iNSCs, respectively.

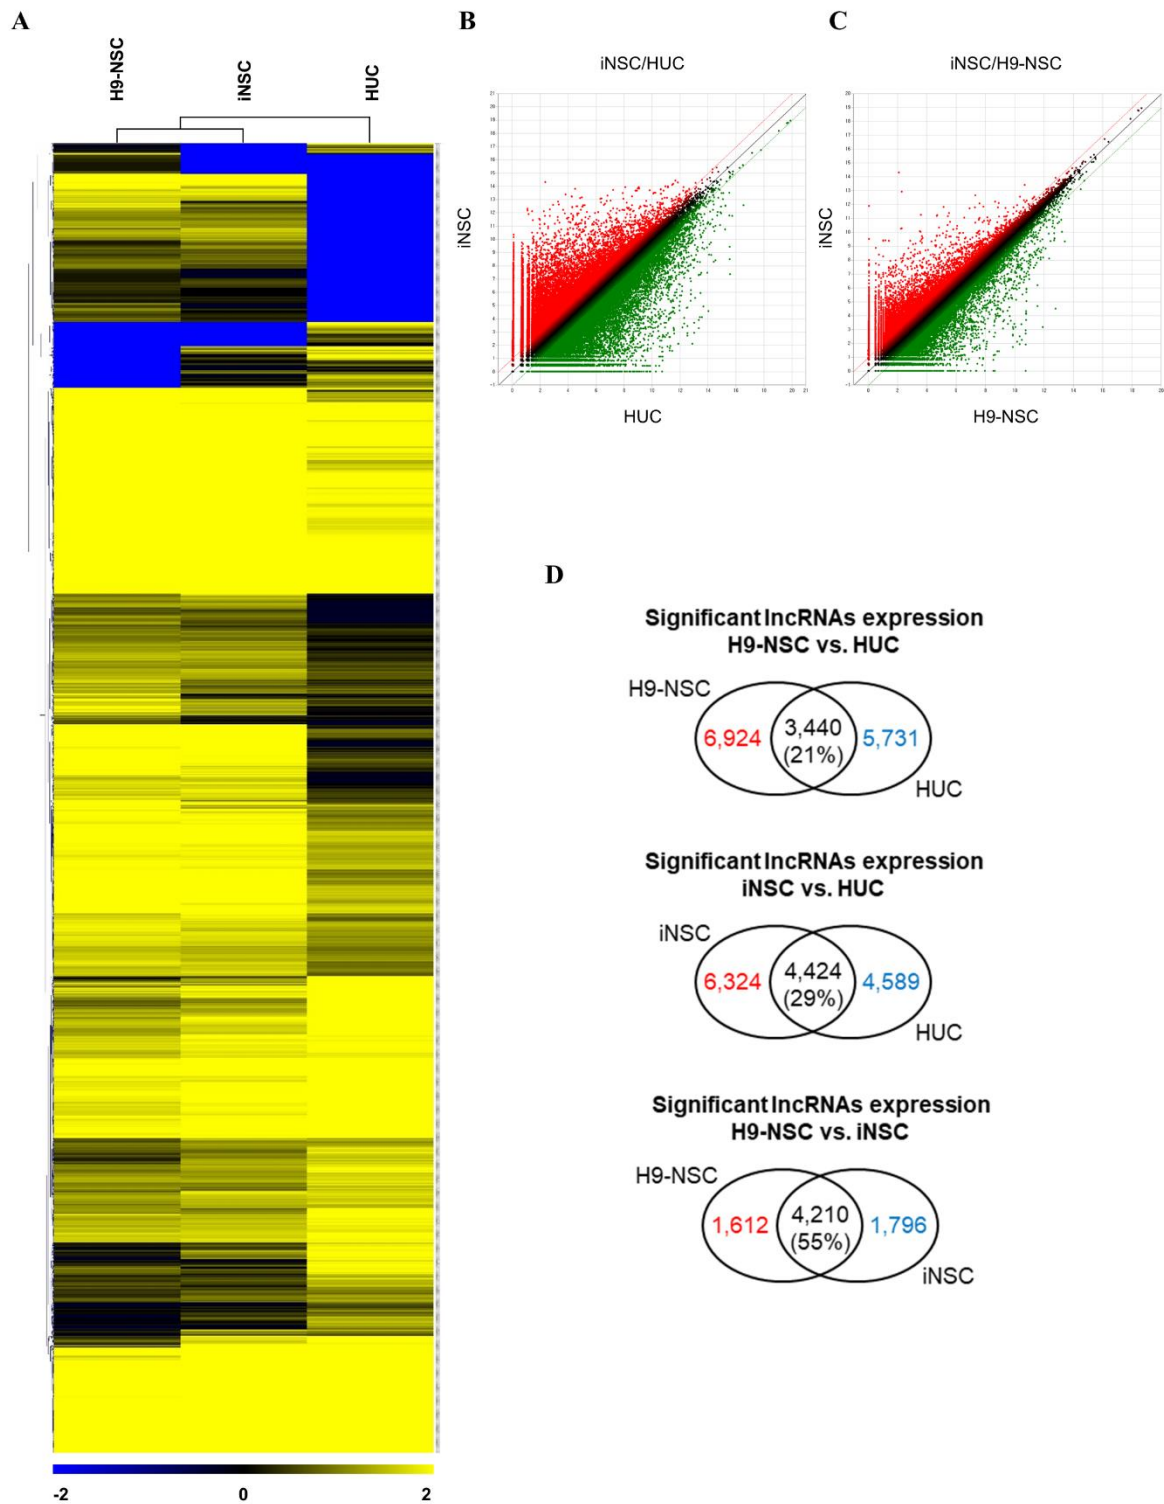

**Supplemental Figure S4.** RNA sequencing analysis of the lncRNA expression profile of iNSCs. **(A)** Hierarchical clustering analysis of lncRNA expression in H9-NSCs, iNSCs, and HUCs. 12,655 lncRNAs are selected with significant p-value ( $p < 0.05$ ) and fold change ( $FC > 2$ ). **(B, C)** Scatter plot analysis of lncRNAs in iNSC vs. H9-NSCs or HUCs. **(D)** Venn diagrams show significant lncRNAs expressions of H9-NSCs vs. HUCs, iNSCs vs.

HUCs and H9-NSCs vs. iNSCs.

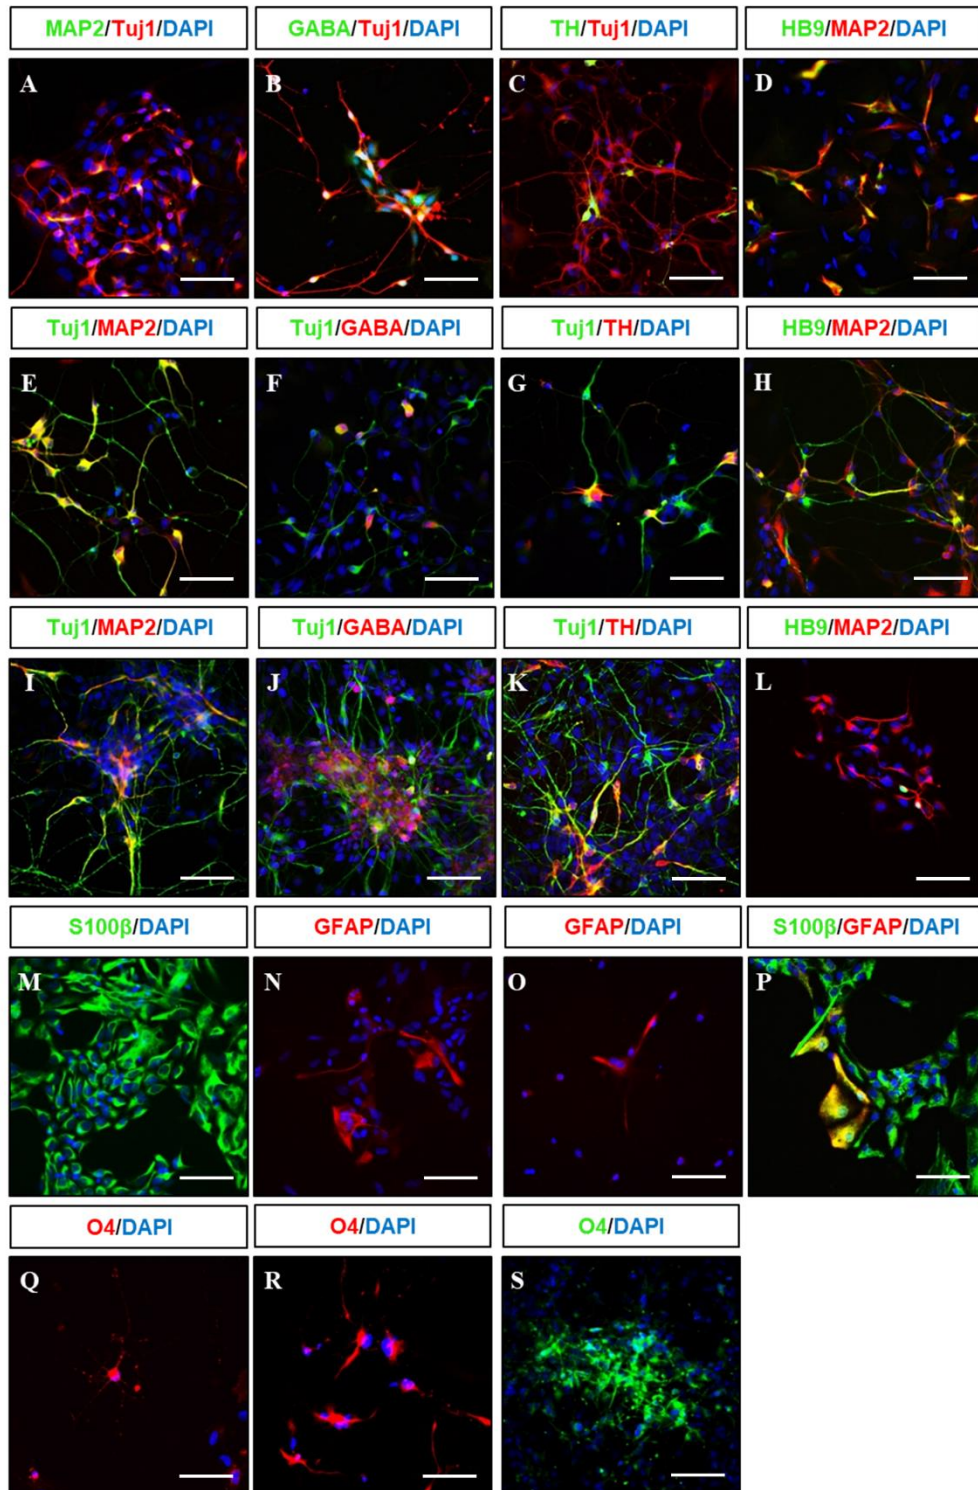

**Supplemental Figure S5.** Differentiation potential of iNSCs derived from healthy donors. (A-D) Neuronal markers expression in iNSC-derived neurons (male, 31-year-old). (E-H) Neuronal markers expression in iNSC-

derived neurons (male, 38-year-old). **(I-L)** Neuronal markers expression in iNSC-derived neurons (female, 36-year-old). **(M, N)** Astroglial markers expression in iNSC-derived astroglia (male, 31-year-old). **(O)** Astroglial markers expression in iNSC-derived astroglia (male, 38-year-old). **(P)** Astroglial markers expression in iNSC-derived astroglia (female, 36-year-old). **(Q)** Oligodendroglial markers expression in iNSC-derived oligodendroglia (male, 31-year-old). **(R)** Oligodendroglial markers expression in iNSC-derived oligodendroglia (male, 38-year-old). **(S)** Oligodendroglial markers expression in iNSC-derived oligodendroglia (female, 36-year-old). Scale bars, 200  $\mu$ m.

**Supplemental Table S1.** Top 20 up-regulated lncRNAs in iNSCs vs. HUCs.

| Top 20 up-regulated lncRNA | lncRNA          | Fold change iNSC vs HUC | P-value   | Fold change H9-NSC vs HUC | P-value   | Chromosome | Start     | End       | Strand | Proximal gene |
|----------------------------|-----------------|-------------------------|-----------|---------------------------|-----------|------------|-----------|-----------|--------|---------------|
| 1                          | NONHSAT196622.1 | 2331.712                | 0.0000001 | 1722.544                  | 0.0006476 | chr3       | 181414728 | 181442487 | -      | SOX2          |
| 2                          | NONHSAT093477.2 | 2165.152                | 0.0000153 | 1608.971                  | 0.0006533 | chr3       | 181420249 | 181442508 | -      | SOX2          |
| 3                          | NONHSAT093478.2 | 2153.799                | 0.0000144 | 1600.403                  | 0.0005219 | chr3       | 181421057 | 181442486 | -      | SOX2          |
| 4                          | NONHSAT126980.2 | 1221.705                | 0.0000595 | 1223.597                  | 0.0090088 | chr8       | 65161144  | 65180341  | -      | BHLHE22       |
| 5                          | NONHSAT096619.2 | 1055.934                | 0.0000384 | 1185.950                  | 0.0052212 | chr4       | 62117904  | 62136756  | -      | ADGRL3        |
| 6                          | NONHSAT058624.2 | 1001.122                | 0.0000207 | 1072.586                  | 0.0000030 | chr18      | 22723490  | 22778173  | -      | ZNF521        |
| 7                          | NONHSAT093475.2 | 818.929                 | 0.0000016 | 619.977                   | 0.0006395 | chr3       | 181373889 | 181442508 | -      | SOX2          |
| 8                          | NONHSAT093476.2 | 818.929                 | 0.0000016 | 619.977                   | 0.0006395 | chr3       | 181373889 | 181442508 | -      | SOX2          |
| 9                          | NONHSAT123010.2 | 802.123                 | 0.0010965 | 1409.944                  | 0.0004956 | chr7       | 121621100 | 121626826 | +      | AASS          |
| 10                         | NONHSAT058625.2 | 772.082                 | 0.0002000 | 826.394                   | 0.0001181 | chr18      | 22723492  | 22786873  | -      | ZNF521        |
| 11                         | NONHSAT178277.1 | 772.082                 | 0.0002000 | 826.394                   | 0.0001181 | chr18      | 22723464  | 22786862  | -      | ZNF521        |
| 12                         | NONHSAT171697.1 | 752.393                 | 0.0000179 | 811.866                   | 0.0038714 | chr15      | 65611231  | 65655846  | -      | IGDCC3        |
| 13                         | NONHSAT194978.1 | 751.779                 | 0.0000183 | 613.630                   | 0.0008442 | chr3       | 181373888 | 181442508 | +      | SOX2          |
| 14                         | NONHSAT058629.2 | 750.851                 | 0.0007248 | 872.322                   | 0.0005249 | chr18      | 22784364  | 22907721  | -      | ZNF521        |
| 15                         | NONHSAT177503.1 | 713.078                 | 0.0000104 | 710.971                   | 0.0042507 | chr18      | 22723487  | 22797009  | +      | ZNF521        |
| 16                         | NONHSAT178276.1 | 682.942                 | 0.0002460 | 731.430                   | 0.0000116 | chr18      | 22704821  | 22786859  | -      | ZNF521        |
| 17                         | NONHSAT162161.1 | 665.913                 | 0.0005899 | 757.660                   | 0.0011770 | chr12      | 48385363  | 48394796  | +      | COL2A1        |
| 18                         | NONHSAT018342.2 | 653.464                 | 0.0009344 | 665.019                   | 0.0074090 | chr11      | 19510892  | 19524078  | -      | NAV2          |
| 19                         | NONHSAT006903.2 | 628.184                 | 0.0000397 | 441.382                   | 0.0040440 | chr1       | 156641665 | 156644887 | -      | NES           |
| 20                         | NONHSAT185419.1 | 626.346                 | 0.0013783 | 2108.576                  | 0.0038614 | chr2       | 118061042 | 118088288 | -      | DDX18         |

**Supplemental Table S2.** . Top 20 down-regulated lncRNAs in iNSCs vs. HUCs.

| Top 20 down-regulated lncRNA | lncRNA          | Fold change iNSC vs HUC | P-value   | Fold change H9-NSC vs HUC | P-value   | Chromosome | Start     | End       | Strand | Proximal gene |
|------------------------------|-----------------|-------------------------|-----------|---------------------------|-----------|------------|-----------|-----------|--------|---------------|
| 1                            | NONHSAT055470.2 | 0.0005738               | 0.0000588 | 0.0007373                 | 0.0000589 | chr17      | 68101708  | 68129530  | +      | KCNJ16        |
| 2                            | NONHSAT090923.2 | 0.0009164               | 0.0008068 | 0.0022107                 | 0.0008098 | chr3       | 101960385 | 101996532 | +      | ZPLD1         |
| 3                            | NONHSAT055474.2 | 0.0009257               | 0.0001268 | 0.0018739                 | 0.0001271 | chr17      | 68114411  | 68135927  | +      | KCNJ16        |
| 4                            | NONHSAT055460.2 | 0.0009340               | 0.0000031 | 0.0015596                 | 0.0000031 | chr17      | 68101554  | 68135929  | +      | KCNJ16        |
| 5                            | NONHSAT055467.2 | 0.0009342               | 0.0000035 | 0.0015597                 | 0.0000035 | chr17      | 68101583  | 68136002  | +      | KCNJ16        |
| 6                            | NONHSAT055472.2 | 0.0009346               | 0.0000031 | 0.0015605                 | 0.0000030 | chr17      | 68101563  | 68133796  | +      | KCNJ16        |
| 7                            | NONHSAT055465.2 | 0.0009414               | 0.0000068 | 0.0015718                 | 0.0000068 | chr17      | 68101975  | 68133796  | +      | KCNJ16        |
| 8                            | NONHSAT073857.2 | 0.0010438               | 0.0007494 | 0.0006061                 | 0.0007487 | chr2       | 113977668 | 113979984 | -      | PAX8          |
| 9                            | NONHSAT037288.2 | 0.0010560               | 0.0029590 | 0.0026546                 | 0.0029686 | chr14      | 62117407  | 62134243  | +      | HIF1A         |
| 10                           | NONHSAT037289.2 | 0.0010560               | 0.0029590 | 0.0026546                 | 0.0029686 | chr14      | 62117407  | 62134184  | +      | HIF1A         |
| 11                           | NONHSAT168547.1 | 0.0010560               | 0.0029590 | 0.0026546                 | 0.0029686 | chr14      | 62117407  | 62134243  | +      | HIF1A         |
| 12                           | NONHSAT055457.2 | 0.0010876               | 0.0030405 | 0.0008403                 | 0.0030389 | chr17      | 68096045  | 68101496  | -      | KCNJ16        |
| 13                           | NONHSAT055458.2 | 0.0010885               | 0.0031414 | 0.0008410                 | 0.0031398 | chr17      | 68096101  | 68101496  | -      | KCNJ16        |
| 14                           | NONHSAT082204.2 | 0.0011137               | 0.0003142 | 0.0014980                 | 0.0003145 | chr21      | 39630270  | 39726085  | +      | KCNJ15        |
| 15                           | NONHSAT055464.2 | 0.0011367               | 0.0000015 | 0.0009753                 | 0.0000016 | chr17      | 68101570  | 68125844  | +      | KCNJ16        |
| 16                           | NONHSAT055469.2 | 0.0011388               | 0.0000075 | 0.0009771                 | 0.0000076 | chr17      | 68101631  | 68125840  | +      | KCNJ16        |
| 17                           | NONHSAT055463.2 | 0.0011477               | 0.0000019 | 0.0009847                 | 0.0000020 | chr17      | 68101567  | 68125543  | +      | KCNJ16        |
| 18                           | NONHSAT055468.2 | 0.0011496               | 0.0000075 | 0.0009863                 | 0.0000076 | chr17      | 68101631  | 68125551  | +      | KCNJ16        |
| 19                           | NONHSAT175520.1 | 0.0011508               | 0.0000165 | 0.0009874                 | 0.0000166 | chr17      | 68101738  | 68125790  | +      | KCNJ16        |
| 20                           | NONHSAT073859.2 | 0.0012108               | 0.0003032 | 0.0006729                 | 0.0003028 | chr2       | 113979568 | 113983258 | +      | PAX8          |
